# ARNTL (BMAL1) and NPAS2 Gene Variants Contribute to Fertility and Seasonality

Leena Kovanen<sup>1,2</sup>, Sirkku T. Saarikoski<sup>2</sup>, Arpo Aromaa<sup>3</sup>, Jouko Lönnqvist<sup>1,4</sup>, Timo Partonen<sup>1\*</sup>

**1** Department of Mental Health and Substance Abuse Services, National Institute for Health and Welfare, Helsinki, Finland, **2** Department of Alcohol, Drugs and Addiction, National Institute for Health and Welfare, Helsinki, Finland, **3** Division of Welfare and Health Policies, National Institute for Health and Welfare, Helsinki, Finland, **4** Department of Psychiatry, University of Helsinki, Helsinki, Finland

## Abstract

**Background:** Circadian clocks guide the metabolic, cell-division, sleep-wake, circadian and seasonal cycles. Abnormalities in these clocks may be a health hazard. Circadian clock gene polymorphisms have been linked to sleep, mood and metabolic disorders. Our study aimed to examine polymorphisms in four key circadian clock genes in relation to seasonal variation, reproduction and well-being in a sample that was representative of the general population, aged 30 and over, living in Finland.

**Methodology/Principal Findings:** Single-nucleotide polymorphisms in the *ARNTL*, *ARNTL2*, *CLOCK* and *NPAS2* genes were genotyped in 511 individuals. 19 variants were analyzed in relation to 31 phenotypes that were assessed in a health interview and examination study. With respect to reproduction, women with *ARNTL* rs2278749 *TT* genotype had more miscarriages and pregnancies, while *NPAS2* rs11673746 *T* carriers had fewer miscarriages. *NPAS2* rs2305160 *A* allele carriers had lower Global Seasonality Scores, a sum score of six items i.e. seasonal variation of sleep length, social activity, mood, weight, appetite and energy level. Furthermore, carriers of *A* allele at *NPAS2* rs6725296 had greater loadings on the metabolic factor (weight and appetite) of the global seasonality score, whereas individuals with *ARNTL* rs6290035 *TT* genotype experienced less seasonal variation of energy level.

**Conclusions/Significance:** *ARNTL* and *NPAS2* gene variants were associated with reproduction and with seasonal variation. Earlier findings have linked *ARNTL* to infertility in mice, but this is the first time when any polymorphism of these genes is linked to fertility in humans.

**Citation:** Kovanen L, Saarikoski ST, Aromaa A, Lönnqvist J, Partonen T (2010) *ARNTL* (*BMAL1*) and *NPAS2* Gene Variants Contribute to Fertility and Seasonality. PLoS ONE 5(4): e10007. doi:10.1371/journal.pone.0010007

**Editor:** Pieter H. Reitsma, Leiden University Medical Center, Netherlands

**Received:** December 15, 2009; **Accepted:** March 10, 2010; **Published:** April 2, 2010

**Copyright:** © 2010 Kovanen et al. This is an open-access article distributed under the terms of the Creative Commons Attribution License, which permits unrestricted use, distribution, and reproduction in any medium, provided the original author and source are credited.

**Funding:** Funding for this study was provided in part by the grant #210262 from the Academy of Finland (<http://www.aka.fi/en-gb/A/>) to Dr Partonen, and the grant #6113 from Yrjö Jahnsson Foundation (<http://www.yjs.fi/>) to Ms Kovanen. The funders had no role in study design, data collection and analysis, decision to publish, or preparation of the manuscript.

**Competing Interests:** The authors have declared that no competing interests exist.

\* E-mail: timo.partonen@thl.fi

## Introduction

Circadian rhythms are the approximate 24-hour oscillations in behavioral or physiological processes that allow organisms to anticipate routine environmental changes and to prepare for the appropriate alignment in order to adapt. Circadian rhythms are generated by the intrinsic clocks whose principal pacemaker is located in the suprachiasmatic nuclei of the anterior hypothalamus. This internal clock is synchronized to the external 24-hour clock by following time-giving cues, primarily the daily light-dark transitions, in the habitat. The principal circadian clock coordinates peripheral oscillators that maintain the timing for a range of physiological functions such as hormone release, body temperature, cardiovascular function and physical activity. Recently, there has been growing interest in the impact of disruption of these rhythms on health.

At the molecular level, circadian rhythms are generated by a network of proteins. The clock protein (*CLOCK*) [1] pairs up with aryl hydrocarbon receptor nuclear translocator-like (*ARNTL* or *BMAL1*) protein [2]. Neuronal PAS domain protein 2 (*NPAS2*)

[3] can substitute for *CLOCK* and aryl hydrocarbon receptor nuclear translocator-like 2 (*ARNTL2* or *BMAL2*) [4] for *ARNTL*. Paired *CLOCK*/*NPAS2*–*ARNTL*/*ARNTL2* heterodimers thereafter activate the transcription of their target genes [5–7].

So far, genetic variations in circadian clock genes have been associated with sleep, mood, and metabolic disorders [8]. Concerning these disorders, *CLOCK* gene variants have been linked to diurnal preference [9,10], delayed sleep phase syndrome [11], metabolic syndrome and obesity [12], *ARNTL* gene variants to bipolar disorder [13], type 2 diabetes and hypertension [14], and *NPAS2* gene variants to diurnal preference and seasonal affective disorder [15,16]. However, in some cases the aforementioned associations are conflicting [17,18], and the established links between circadian clock gene polymorphisms and disease susceptibility therefore remain incomplete.

Our aim was to examine the role of 19 single-nucleotide polymorphisms (SNPs) of four canonical circadian clock genes (*ARNTL*, *ARNTL2*, *CLOCK*, *NPAS2*) in relation to a range of health-related phenotypes that were assessed with structured methods as part of a population-based health interview and

examination study. Here, we report associations with seasonal variation, reproduction, and social activity.

## Methods

### Subjects

This study was part of a nationwide health interview and examination survey whose design and methods are described in detail on the <http://www.terveys2000.fi/indexe.html> site. The ethical approval of the survey has been accepted by the ethics committee of the National Public Health Institute and all participants provided written informed consent. Of the 7415 participants aged 30 or over, 5480 took part to a health status examination and a diagnostic mental health interview (M-CIDI [19]), a valid and reliable instrument for the assessment of alcohol use, mood and anxiety disorders, yielding the diagnosis according to DSM-IV, filled in the self-report questionnaires, and gave a venous blood sample for DNA extraction. The sample that was drawn from the study for our analysis included 511 individuals (9.3% of the eligible participants) having no diagnosis of mental disorder. Of the study subjects that were originally selected as healthy controls for those with alcohol use disorder, 412 were men and 99 women.

### Analyzed phenotypes

The study sample that was derived from an epidemiological nation-wide cohort, representative of the population, is well characterized. This allowed an extensive phenotype analysis concerning data on reproduction, seasonal variation and mental well-being. Altogether 31 phenotypes were analyzed (Table 1).

Regarding reproduction, the menstrual cycle (irregular or no periods versus regular periods in women aged 54 or under), the number of pregnancies (ended in a delivery, a miscarriage, or an abortion), elevated blood pressure during a pregnancy, the number of miscarriages, and infertility (failure to get pregnant within 12 months) were analyzed. Sample size for these phenotypes was small due to the small number of women in our study.

With regard to seasonal variation in mood and behavior, the participants filled in a modified Seasonal Pattern Assessment Questionnaire (SPAQ) [20]. Seasonal variation in sleep length, social activity, mood, weight, appetite, and energy level were scored from 0 to 3 (none, slight, moderate or marked change) instead of 0 to 4 (none, slight, moderate, marked or extremely marked change). The sum score of the six items is the global seasonality score (GSS). The psychometric properties of this modified questionnaire have been tested [21]. The factor analysis produced two factors: factor one (GSS1) including the items of weight, and appetite; and factor two (GSS2) including the items of sleep length, social activity, mood, and energy level. The participants who reported of having any variation were divided into those who did not experience the variations as a problem and those who experienced them as mild ( $n = 37$ ), moderate ( $n = 2$ ), marked ( $n = 0$ ) and severe ( $n = 1$ ) problems.

Social activity was assessed with the sum of two questions asking for the frequencies of social contacts at home and those at visit. Concerning mental well-being, the phenotypes analyzed are listed in Table 1 and described in more detail in the supporting information (see Text S1).

### SNP selection and genotyping

Five SNPs for *ARNTL*, *ARNTL2* and *NPAS2* and four SNPs for *CLOCK* were selected (Table 2). SNPs included Hap-Map tag-SNPs and candidate SNPs selected on the basis of previous association studies with health-related condition or behavior.

Genomic DNA was isolated from whole blood according to standard procedures. SNPs were genotyped in 10  $\mu$ l reactions with

**Table 1.** Phenotypes analyzed in the study.<sup>a</sup>

| Phenotype                                               | A   | B   |
|---------------------------------------------------------|-----|-----|
| <b>Reproduction</b>                                     |     |     |
| Men: Infertility                                        | 35  | 376 |
| Women: Infertility                                      | 19  | 80  |
| Irregular or no periods in women less than 54 years old | 20  | 61  |
| Number of pregnancies                                   | 99  |     |
| Number of miscarriages                                  | 85  |     |
| High blood pressure during pregnancy                    | 23  | 59  |
| <b>Seasonal variation</b>                               |     |     |
| Global seasonality score (GSS)                          | 511 |     |
| Global seasonality score factor 1 (GSS1)                | 511 |     |
| Global seasonality score factor 2 (GSS2)                | 511 |     |
| Seasonal variation in sleep length                      | 364 | 147 |
| Seasonal variation in social activity                   | 348 | 163 |
| Seasonal variation in mood                              | 364 | 147 |
| Seasonal variation in weight                            | 225 | 286 |
| Seasonal variation in appetite                          | 187 | 324 |
| Seasonal variation in energy                            | 362 | 149 |
| If seasonal variation experienced in above, a problem?  | 40  | 391 |
| Vitamin D, S-D-25, nmol/l                               | 504 |     |
| <b>Well-being</b>                                       |     |     |
| Beck Depression Inventory (BDI)                         | 510 |     |
| Beck Depression Inventory factor 1 (BDI1)               | 499 |     |
| Beck Depression Inventory factor 2 (BDI2)               | 499 |     |
| General Health Questionnaire (GHQ)                      | 510 |     |
| General Health Questionnaire factor 1 (GHQ1)            | 500 |     |
| General Health Questionnaire factor 2 (GHQ2)            | 500 |     |
| Health related quality of life factor 1 (15-D 1)        | 510 |     |
| Health related quality of life factor 1 (15-D 2)        | 510 |     |
| Health related quality of life factor 1 (15-D 3)        | 510 |     |
| Epworth Sleepiness Scale factor 1 (ESS1)                | 490 |     |
| Epworth Sleepiness Scale factor 2 (ESS2)                | 490 |     |
| Hours of sleep in 24 hours                              | 500 |     |
| Social activity                                         | 194 | 119 |
| Maslach Burnout Inventory (MBI)                         | 396 |     |

<sup>a</sup>Positive (A) and negative (B) status with respect to the phenotype analyzed. In case of continuous variables, the number of subjects is given in the column A. doi:10.1371/journal.pone.0010007.t001

a fluorogenic 5' nuclease assay method (TaqMan<sup>TM</sup>) with pre-designed primer-probe kits using Applied Biosystems 7300 Real Time PCR System according to manufacturers' instructions. All the samples were successfully genotyped, and those 5% of the samples that were re-genotyped did confirm the genotyping results to have no error. Genotyping of the first 276 samples indicated that *ARNTL2* rs35878285 was not polymorphic in our sample, and it was therefore excluded from further analysis, leaving 18 SNPs for the statistical analysis.

### Statistical analysis

Statistical analyses of the data were performed by using the PLINK software, version 1.05 (<http://pngu.mgh.harvard.edu/purcell/plink/>) [22]. The genotype and allele frequencies and the

**Table 2.** Genotype and allele frequencies and Hardy-Weinberg equilibrium estimate P-values.

| Gene          | SNP        | Alleles |   | Genotype counts (%) |            |            | HWE <sup>P</sup> | Allele counts (%) |            |
|---------------|------------|---------|---|---------------------|------------|------------|------------------|-------------------|------------|
|               |            | 1       | 2 | 11                  | 12         | 22         |                  | 1                 | 2          |
| <i>NPAS2</i>  | rs10206927 | G       | C | 347 (67.9)          | 150 (29.4) | 14 (2.7)   | 0.76             | 844 (82.6)        | 178 (17.4) |
| <i>NPAS2</i>  | rs6725296  | G       | A | 390 (76.3)          | 116 (22.7) | 5 (1.0)    | 0.31             | 896 (87.7)        | 126 (12.3) |
| <i>NPAS2</i>  | rs11673746 | C       | T | 249 (48.7)          | 208 (40.7) | 54 (10.6)  | 0.3              | 706 (69.1)        | 316 (30.9) |
| <i>NPAS2</i>  | rs11541353 | C       | T | 352 (68.9)          | 143 (28.0) | 16 (3.1)   | 0.76             | 847 (82.9)        | 175 (17.1) |
| <i>NPAS2</i>  | rs2305160  | G       | A | 252 (49.3)          | 218 (42.7) | 41 (8.0)   | 0.59             | 722 (70.6)        | 300 (29.4) |
| <i>CLOCK</i>  | rs2412646  | C       | T | 278 (54.4)          | 197 (38.6) | 36 (7.0)   | 0.91             | 753 (73.7)        | 269 (26.3) |
| <i>CLOCK</i>  | rs11240    | C       | G | 221 (43.2)          | 242 (47.4) | 48 (9.4)   | 0.13             | 684 (66.9)        | 338 (33.1) |
| <i>CLOCK</i>  | rs2412648  | T       | G | 208 (40.7)          | 232 (45.4) | 71 (13.9)  | 0.63             | 648 (63.4)        | 374 (36.6) |
| <i>CLOCK</i>  | rs3805151  | T       | C | 182 (35.6)          | 244 (47.7) | 85 (16.6)  | 0.85             | 608 (59.5)        | 414 (40.5) |
| <i>ARNTL</i>  | rs6486120  | G       | T | 277 (54.2)          | 183 (35.8) | 51 (10.0)  | 0.015            | 737 (72.1)        | 285 (27.9) |
| <i>ARNTL</i>  | rs1982350  | G       | A | 179 (35.0)          | 224 (43.8) | 108 (21.1) | 0.019            | 582 (56.9)        | 440 (43.1) |
| <i>ARNTL</i>  | rs3816360  | C       | T | 151 (29.5)          | 245 (47.9) | 115 (22.5) | 0.42             | 547 (53.5)        | 475 (46.5) |
| <i>ARNTL</i>  | rs2278749  | C       | T | 327 (64.0)          | 162 (31.7) | 22 (4.3)   | 0.78             | 816 (79.8)        | 206 (20.2) |
| <i>ARNTL</i>  | rs2290035  | A       | T | 175 (34.2)          | 242 (47.4) | 94 (18.4)  | 0.53             | 592 (57.9)        | 430 (42.1) |
| <i>ARNTL2</i> | rs7958822  | G       | A | 145 (28.4)          | 262 (51.3) | 104 (20.4) | 0.53             | 552 (54)          | 470 (46)   |
| <i>ARNTL2</i> | rs4964057  | T       | G | 177 (34.6)          | 241 (47.2) | 93 (18.2)  | 0.52             | 595 (58.2)        | 427 (41.8) |
| <i>ARNTL2</i> | rs1037921  | A       | G | 429 (84.0)          | 79 (15.5)  | 3 (0.6)    | 1                | 937 (91.7)        | 85 (8.3)   |
| <i>ARNTL2</i> | rs2306074  | T       | C | 210 (41.1)          | 240 (47)   | 61 (11.9)  | 0.63             | 660 (64.6)        | 362 (35.4) |
| <i>ARNTL2</i> | rs35878285 | A       | - | (100)               |            |            |                  | (100)             |            |

Abbreviation: HWE<sup>P</sup>, Hardy-Weinberg equilibrium p-value.  
doi:10.1371/journal.pone.0010007.t002

Hardy-Weinberg equilibrium (HWE) estimates were calculated. SNPs were compared between participants with a condition and those without the condition, or in relation to a quantitative measure. Additive, dominant and recessive models were calculated using linear and logistic regression models for the quantitative and categorized traits respectively. Age and sex were controlled for in the analyses. To correct SNP analyses for multiple testing across all the tests performed, the R software (<http://www.r-project.org/>) was used to calculate false discovery rate (FDR) q-values [23]. The Haploview software [24] was used to calculate the linkage disequilibrium (LD) estimates. The formed haplotype blocks were analyzed by using the PLINK software, with the sliding window approach, regression models, and controlling for age and sex.

## Results

The calculated genotype and allele frequencies and HWE estimates are given in Table 2. All the SNPs were in HWE ( $P > 0.01$ ) in the 511 subjects. The most significant associations ( $q < 0.4$ ) are listed in Table 3, and they are discussed below (see Table S1, for all the associations having  $P < 0.01$ ). One of these associations had a false discovery rate q-value under 0.05. It is of note that there was no significant association with *ARNTL2*. In the haplotype analysis (see Table S2), P-values for haplotypes in the formed blocks (see Figure S1) were higher than for the individual SNPs within the haplotype and thus are not discussed.

The  $A^+$  allelic status ( $AA$  and  $AG$  genotypes) of *NPAS2* rs2305160 was over-represented among individuals not experiencing seasonal variation ( $P < 0.001$ ) as measured with the GSS. The  $A$  allele ( $P < 0.001$ ) and the  $A^+$  ( $AA$  or  $AG$  genotypes) allelic status ( $P < 0.01$ ) of *NPAS2* rs6725296 were associated with the GSS1 and with the single item of seasonal variation in weight. In addition, people with

the  $TT$  genotype of *ARNTL* rs2290035 were more likely not to experience seasonal variation in energy level ( $P < 0.001$ ).

The  $TT$  genotype of *ARNTL* rs2278749 was associated with both a higher number of pregnancies ( $P < 0.01$ ) and a higher number of miscarriages ( $P < 0.000001$ ), whereas the  $T^+$  ( $TT$  or  $CT$  genotypes) allelic status of *NPAS2* rs11673746 was linked to a lower number of miscarriages ( $P < 0.01$ ).

Individuals with the  $TT$  genotype of *CLOCK* rs2412646 were more likely to have a lower level of social activity ( $P < 0.01$ ).

## Discussion

Our aim was to investigate genetic variants of the four key circadian clock genes *ARNTL*, *ARNTL2*, *CLOCK* and *NPAS2* in relation to a range of health related phenotypes assessed in a representative nation-wide sample of the population aged 30 or over. These genes together with other circadian clock genes generate the circadian rhythms and the seasonal cycles, such as reproduction related activities, as well as have control for the cell-division cycle and the metabolic cycle [25,26].

Circadian rhythms and clock genes have previously been connected to reproductive functions in animal models [27], but no studies on the role of these genes in human fertility have been published. In studies with *ARNTL* knockout mice [28], both male and female homozygous knockout mice were infertile or had reduced fertility [29–32]. Their results indicated an inability to carry on viable pregnancies and some degree of embryo lethality in these mice. The reason for this infertility remains unclear, but Alvarez *et al.* (2008) speculated that it was most likely to result from altered levels of reproductive hormones. We found that the  $TT$  genotype of *ARNTL* rs2278749 was linked to a higher number of pregnancies and a higher number of miscarriages, whereas and the

**Table 3.** SNPs showing evidence for association at  $q < 0.4$ .<sup>a</sup>

| Variable                           | Gene         | SNP        | Test | Re        | Beta  | S.E. | L95% CI | U95% CI | P-value            | q-value |
|------------------------------------|--------------|------------|------|-----------|-------|------|---------|---------|--------------------|---------|
| Number of pregnancies              | <i>ARNTL</i> | rs2278749  | REC  | <i>TT</i> | 7.2   | 2.12 | 3.04    | 11.35   | 0.001              | 0.28    |
| Number of miscarriages             | <i>ARNTL</i> | rs2278749  | REC  | <i>TT</i> | 4.65  | 0.83 | 3.03    | 6.27    | $3 \times 10^{-7}$ | 0.0004  |
| Number of miscarriages             | <i>NPAS2</i> | rs11673746 | DOM  | <i>T+</i> | -0.64 | 0.2  | -1.03   | -0.25   | 0.002              | 0.33    |
| GSS                                | <i>NPAS2</i> | rs2305160  | DOM  | <i>A+</i> | -0.81 | 0.24 | -1.29   | -0.33   | 0.0009             | 0.28    |
| GSS factor 1                       | <i>NPAS2</i> | rs6725296  | ADD  | <i>A</i>  | 0.27  | 0.08 | 0.11    | 0.42    | 0.0008             | 0.28    |
| GSS factor 1                       | <i>NPAS2</i> | rs6725296  | DOM  | <i>A+</i> | 0.27  | 0.08 | 0.1     | 0.43    | 0.001              | 0.33    |
| Variable                           | Gene         | SNP        | Test | Re        | OR    | S.E. | L95% CI | U95% CI | P-value            | q-value |
| Seasonal variation in weight       | <i>NPAS2</i> | rs6725296  | ADD  | <i>A</i>  | 1.95  | 0.2  | 1.32    | 2.89    | 0.0009             | 0.28    |
| Seasonal variation in weight       | <i>NPAS2</i> | rs6725296  | DOM  | <i>A+</i> | 1.95  | 0.21 | 1.29    | 2.96    | 0.002              | 0.33    |
| Seasonal variation in energy level | <i>ARNTL</i> | rs2290035  | REC  | <i>TT</i> | 0.45  | 0.24 | 0.28    | 0.72    | 0.0008             | 0.28    |
| Social activity                    | <i>CLOCK</i> | rs2412646  | REC  | <i>TT</i> | 0.2   | 0.53 | 0.07    | 0.56    | 0.002              | 0.38    |

<sup>a</sup>Results presented for the rare allele/genotype.

Abbreviations: GSS, Global Seasonality Score; SNP, single-nucleotide polymorphism; REC, recessive model; DOM, dominant model; ADD, additive model; Re, reference allele/genotype(s); OR, odds ratio; S.E., standard error; L95% CI, lower bound of the 95% confidence interval; U95% CI, upper bound of the 95% confidence interval. doi:10.1371/journal.pone.0010007.t003

$T^+$  allelic status of *NPAS2* rs11673746 was linked to a lower number of miscarriages. It may be that *NPAS2* plays a role in the human fertility through its potential effect on appetite and weight that follow a seasonal pattern. All in all, our data now suggest that *ARNTL* and *NPAS2* may be involved also in the human fertility.

We investigated seasonal variation by using Global Seasonality Score, a sum score of six items, i.e. seasonal variation of sleep length, social activity, mood, weight, appetite, and energy level. High global seasonality scores can be indicative of seasonal affective disorder, also known as winter depression that is characterized by routine fluctuations in behavior over the year and depressive episodes during a particular period of the year [33]. Depressive and bipolar disorders as well as their subtypes with the seasonal pattern have circadian rhythm misalignments [34,35]. In our current study, individuals with the  $A^+$  allelic status of *NPAS2* rs2305160 (Ala394Thr) were demonstrated to have lower global seasonality scores indicative of less seasonal variation. Earlier, a haplotype with the *G* allele of rs2305160 was suggestively protective against depression [36]. In the haplotype, rs1374324 was the only single SNP associated with depression and linkage of this SNP to rs2305160 might explain the discrepancy. In our study rs1374324 was not analyzed. The  $A^+$  allelic status has previously been associated with lower levels of free and bioavailable testosterone [37]. Testosterone levels exhibit seasonal variation [38–40], and the hormone affects both mood and behavior [41]. Here, we thus hypothesize that the effect of *NPAS2* rs2305160 on seasonality may, at least in part, be mediated via an influence on testosterone levels.

*NPAS2* rs2305160 is in LD with *NPAS2* rs11541353 (S471L) that has been demonstrated to associate with hypertension as part of the metabolic syndrome [42]. Here, our results demonstrate that the  $A^+$  allelic status of *NPAS2* rs6725296 was associated with loadings on the metabolic factor of the global seasonality score, which is composed of seasonal variation of weight and appetite. The role of *NPAS2* in eating behavior is supported by an observation that *NPAS2* deficient mice have impaired ability to adapt to restricted feeding schedule [43]. As the circadian, metabolic and cell-division cycles appear to be coordinated in a similar way, deficient *NPAS2* may have an adverse effect on these functions [25,44,45]. On the other hand, experienced poor lighting increases the risk of the metabolic syndrome through its

contribution to the metabolic factor of the global seasonality score [46]. Our findings now suggest that seasonal weight gain bridges *NPAS2* and hypertension to the pathogenesis of the metabolic syndrome. Exposures to light or lighting conditions may modify the pathogenesis through their actions on testosterone production [47] and its subsequent effects. Here, no significant association was observed for *NPAS2* rs11541353 even though this SNP has been linked to seasonal affective disorder [15], the association however being only with the clinical diagnosis but not with the GSS. In the current study, we analyzed individuals whose seasonal variations were assessed but who had no diagnosis of mental disorder, and therefore the findings do not disagree. With respect to *ARNTL*, the *TT* genotype of rs2290035 was associated with less seasonal variation in energy level. In our earlier study, it was the heterozygous genotype that was overrepresented among patients with winter depression [16] of which 96% report routine seasonal variation in energy level [48].

As a new finding, we found an association of *CLOCK* rs2412646 with social activity. Support for the role of *CLOCK* in the behavioral activity is provided by a study in which another *CLOCK* variant, rs1801260 (T311C), was linked to the diurnal activity levels in depressed patients [49,50], and on the other hand in mice disruption of *CLOCK* contributes to overactive or manic-like behavior [51]. Social withdrawal is a common feature in depression and *CLOCK* gene polymorphisms have been associated with mood disorders [52,53] even though contradictory studies exist [54–56]. In addition, *NPAS2* is a close analog of *CLOCK* and its polymorphisms have earlier been associated with autism [57], a disorder characterized among others with impaired social interaction and communication.

Our study sample derives from the Finnish population, which has reduced genetic and environmental heterogeneity [58]. Moreover, the sample was identified from an epidemiological cohort that is well-characterized for somatic and psychiatric wellbeing allowing detailed phenotype analysis. However, the small sample size for reproductive phenotypes in women, number of SNPs per gene and multiple testing need to be seen as limitations. The most significant association between *ARNTL* rs2278749 and increased risk of miscarriages remains significant after false discovery rate analysis. To assess the significance of the findings replication in other cohorts is needed.

To conclude, we found that genetic variations in *ARNTL* and *NPAS2* genes associated with fertility and seasonality. Our results thus support the previous observation of the role of these genes in seasonal physiology, whereas this is the first time circadian clock related genetic variants are reported to associate with the human fertility.

## Supporting Information

**Text S1** Analyzed phenotypes related to mental well-being. Found at: doi:10.1371/journal.pone.0010007.s001 (0.02 MB PDF)

**Table S1** SNPs with p-value of less than or equal to 0.01. Found at: doi:10.1371/journal.pone.0010007.s002 (0.02 MB PDF)

## References

- Vitaterna MH, King DP, Chang AM, Kornhauser JM, Lowrey PL, et al. (1994) Mutagenesis and mapping of a mouse gene, clock, essential for circadian behavior. *Science* 264(5159): 719–725.
- Ikeda M, Nomura M (1997) cDNA cloning and tissue-specific expression of a novel basic helix-loop-helix/PAS protein (BMAL1) and identification of alternatively spliced variants with alternative translation initiation site usage. *Biochem Biophys Res Commun* 233(1): 258–264.
- Zhou YD, Barnard M, Tian H, Li X, Ring HZ, et al. (1997) Molecular characterization of two mammalian bHLH-PAS domain proteins selectively expressed in the central nervous system. *Proc Natl Acad Sci U S A* 94(2): 713–718.
- Ikeda M, Yu W, Hirai M, Ebisawa T, Honma S, et al. (2000) cDNA cloning of a novel bHLH-PAS transcription factor superfamily gene, BMAL2: Its mRNA expression, subcellular distribution, and chromosomal localization. *Biochem Biophys Res Commun* 275(2): 493–502.
- Reick M, Garcia JA, Dudley C, McKnight SL (2001) NPAS2: An analog of clock operative in the mammalian forebrain. *Science* 293(5529): 506–509.
- Oishi K, Miyazaki K, Kadota K, Kikuno R, Nagase T, et al. (2003) Genome-wide expression analysis of mouse liver reveals CLOCK-regulated circadian output genes. *J Biol Chem* 278(42): 41519–41527.
- Sasaki M, Yoshitane H, Du NH, Okano T, Fukada Y (2009) Preferential inhibition of BMAL2-CLOCK activity by PER2 reemphasizes its negative role and a positive role of BMAL2 in the circadian transcription. *J Biol Chem* 284(37): 25149–25159.
- Takahashi JS, Hong HK, Ko CH, McDearmon EL (2008) The genetics of mammalian circadian order and disorder: Implications for physiology and disease. *Nat Rev Genet* 9(10): 764–775.
- Katzenberg D, Young T, Finn L, Lin L, King DP, et al. (1998) A CLOCK polymorphism associated with human diurnal preference. *Sleep* 21(6): 569–576.
- Mishima K, Tozawa T, Satoh K, Saitoh H, Mishima Y (2005) The 3111T/C polymorphism of hClock is associated with evening preference and delayed sleep timing in a Japanese population sample. *Am J Med Genet B Neuropsychiatr Genet* 133B(1): 101–104.
- Iwase T, Kajimura N, Uchiyama M, Ebisawa T, Yoshimura K, et al. (2002) Mutation screening of the human clock gene in circadian rhythm sleep disorders. *Psychiatry Res* 109(2): 121–128.
- Scott EM, Carter AM, Grant PJ (2008) Association between polymorphisms in the clock gene, obesity and the metabolic syndrome in man. *Int J Obes (Lond)* 32(4): 658–662.
- Nievergelt CM, Kripke DF, Barrett TB, Burg E, Remick RA, et al. (2006) Suggestive evidence for association of the circadian genes PERIOD3 and ARNTL with bipolar disorder. *Am J Med Genet B Neuropsychiatr Genet* 141B(3): 234–241.
- Woon PY, Kaisaki PJ, Braganca J, Bihoreau MT, Levy JC, et al. (2007) Aryl hydrocarbon receptor nuclear translocator-like (BMAL1) is associated with susceptibility to hypertension and type 2 diabetes. *Proc Natl Acad Sci U S A* 104(36): 14412–14417.
- Johansson C, Willett M, Smedh C, Ekholm J, Paunio T, et al. (2003) Circadian clock-related polymorphisms in seasonal affective disorder and their relevance to diurnal preference. *Neuropsychopharmacology* 28(4): 734–739.
- Partonen T, Treutlein J, Alpmann A, Frank J, Johansson C, et al. (2007) Three circadian clock genes Per2, Arntl, and Npas2 contribute to winter depression. *Ann Med* 39(3): 229–238.
- Robilliard DL, Archer SN, Arendt J, Lockley SW, Hack LM, et al. (2002) The 3111 clock gene polymorphism is not associated with sleep and circadian rhythmicity in phenotypically characterized human subjects. *J Sleep Res* 11(4): 305–312.
- Pedrazzoli M, Louzada FM, Pereira DS, Benedito-Silva AA, Lopez AR, et al. (2007) Clock polymorphisms and circadian rhythms phenotypes in a sample of the Brazilian population. *Chronobiol Int* 24(1): 1–8.
- Wittchen HU, Lachner G, Wunderlich U, Pfister H (1998) Test-retest reliability of the computerized DSM-IV version of the Munich-Composite International Diagnostic Interview (M-CIDI). *Soc Psychiatry Psychiatr Epidemiol* 33(11): 568–578.
- Rosenthal NE, Bradt GH, Wehr TA (1984) Seasonal Pattern Assessment Questionnaire. Bethesda: National Institute of Mental Health.
- Rintamaki R, Grimaldi S, Englund A, Haukka J, Partonen T, et al. (2008) Seasonal changes in mood and behavior are linked to metabolic syndrome. *PLoS One* 3(1): e1482.
- Purcell S, Neale B, Todd-Brown K, Thomas L, Ferreira MA, et al. (2007) PLINK: A tool set for whole-genome association and population-based linkage analyses. *Am J Hum Genet* 81(3): 559–575.
- Storey JD (2003) The positive false discovery rate: A Bayesian interpretation and the q-value. *The Annals of Statistics* 31(6): 2013–2035.
- Barrett JC, Fry B, Maller J, Daly MJ (2005) Haploview: Analysis and visualization of LD and haplotype maps. *Bioinformatics* 21(2): 263–265.
- Gillette MU, Sejnowski TJ (2005) Biological clocks coordinately keep life on time. *Science* 309(5738): 1196–1198.
- Ko CH, Takahashi JS (2006) Molecular components of the mammalian circadian clock. *Hum Mol Genet* 15 Spec No 2: R271–7.
- Boden MJ, Kennaway DJ (2006) Circadian rhythms and reproduction. *Reproduction* 132(3): 379–392.
- Bunger MK, Wilsbacher LD, Moran SM, Clendenen C, Radcliffe LA, et al. (2000) Mop3 is an essential component of the master circadian pacemaker in mammals. *Cell* 103(7): 1009–1017.
- Alvarez JD, Hansen A, Ord T, Bebas P, Chappell PE, et al. (2008) The circadian clock protein BMAL1 is necessary for fertility and proper testosterone production in mice. *J Biol Rhythms* 23(1): 26–36.
- Boden MJ, Kennaway DJ (2005) Reproduction in the arrhythmic *Bmal1* knockout mouse. *Reprod Fertil Dev* 17(9): 126–126.
- Boden MJ, Kennaway DJ (2004) Reproductive consequences of circadian dysfunction: fertility in the *Bmal1* null mouse. *Reprod Fertil Dev* 16(9): 280–280.
- Kondratov RV, Kondratova AA, Gorbacheva VY, Vykhovanets OV, Antoch MP (2006) Early aging and age-related pathologies in mice deficient in BMAL1, the core component of the circadian clock. *Genes Dev* 20(14): 1868–1873.
- Rosenthal NE, Sack DA, Gillin JC, Lewy AJ, Goodwin FK, et al. (1984) Seasonal affective disorder: a description of the syndrome and preliminary findings with light therapy. *Arch Gen Psychiatry* 41(1): 72–80.
- Partonen T, Lonnqvist J (1998) Seasonal affective disorder. *Lancet* 352(9137): 1369–1374.
- Lewy AJ, Lefler BJ, Emens JS, Bauer VK (2006) The circadian basis of winter depression. *Proc Natl Acad Sci U S A* 103(19): 7414–7419.
- Lavebratt C, Sjöholm LK, Partonen T, Schalling M, Forsell Y (2010) PER2 variation is associated with depression vulnerability. *Am J Med Genet B Neuropsychiatr Genet* 153B(2): 570–81.
- Chu LW, Zhu Y, Yu K, Zheng T, Chokkalingam AP, et al. (2008) Correlation between circadian gene variants and serum levels of sex steroids and insulin-like growth factor-I. *Cancer Epidemiol Biomarkers Prev* 17(11): 3268–3273.
- van Anders SM, Hampson E, Watson NV (2006) Seasonality, waist-to-hip ratio, and salivary testosterone. *Psychoneuroendocrinology* 31(7): 895–899.
- Perry HM, 3rd, Miller DK, Patrick P, Morley JE (2000) Testosterone and leptin in older African-American men: Relationship to age, strength, function, and sense. *Metabolism* 49(8): 1085–1091.
- Svartheg J, Jorde R, Sundsfjord J, Bonna KH, Barrett-Connor E (2003) Seasonal variation of testosterone and waist to hip ratio in men: the Tromsø study. *J Clin Endocrinol Metab* 88(7): 3099–3104.
- Zitzmann M (2006) Testosterone and the brain. *Aging Male* 9(4): 195–199.
- Englund A, Kovanen L, Saarikoski ST, Haukka J, Reunanen A, et al. (2009) NPAS2 and PER2 are linked to risk factors of the metabolic syndrome. *J Circadian Rhythms* 7: 5.

43. Dudley CA, Erbel-Sieler C, Estill SJ, Reick M, Franken P, et al. (2003) Altered patterns of sleep and behavioral adaptability in NPAS2-deficient mice. *Science* 301(5631): 379–383.
44. Rutter J, Reick M, Wu LC, McKnight SL (2001) Regulation of clock and NPAS2 DNA binding by the redox state of NAD cofactors. *Science* 293(5529): 510–514.
45. Chen Z, Odstreil EA, Tu BP, McKnight SL (2007) Restriction of DNA replication to the reductive phase of the metabolic cycle protects genome integrity. *Science* 316(5833): 1916–1919.
46. Grimaldi S, Englund A, Partonen T, Haukka J, Pirkola S, et al. (2009) Experienced poor lighting contributes to the seasonal fluctuations in weight and appetite that relate to the metabolic syndrome. *J Environ Public Health*, 2009: 165013.
47. Ruhayel Y, Malm G, Haugen TB, Henrichsen T, Bjorsvik C, et al. (2007) Seasonal variation in serum concentrations of reproductive hormones and urinary excretion of 6-sulfatoxymelatonin in men living north and south of the arctic circle: A longitudinal study. *Clin Endocrinol (Oxf)* 67(1): 85–92.
48. Magnusson A, Partonen T (2005) The diagnosis, symptomatology, and epidemiology of seasonal affective disorder. *CNS Spectr* 10(8): 625–34; quiz 1–14.
49. Benedetti F, Radaelli D, Bernasconi A, Dallaspezia S, Falini A, et al. (2008) Clock genes beyond the clock: CLOCK genotype biases neural correlates of moral valence decision in depressed patients. *Genes Brain Behav* 7(1): 20–25.
50. Benedetti F, Dallaspezia S, Fulgosi MC, Lorenzi C, Serretti A, et al. (2007) Actimetric evidence that CLOCK 3111 T/C SNP influences sleep and activity patterns in patients affected by bipolar depression. *Am J Med Genet B Neuropsychiatr Genet* 144B(5): 631–635.
51. Roybal K, Theobald D, Graham A, DiNieri JA, Russo SJ, et al. (2007) Mania-like behavior induced by disruption of CLOCK. *Proc Natl Acad Sci U S A* 104(15): 6406–6411.
52. Shi J, Wittke-Thompson JK, Badner JA, Hattori E, Potash JB, et al. (2008) Clock genes may influence bipolar disorder susceptibility and dysfunctional circadian rhythm. *Am J Med Genet B Neuropsychiatr Genet* 147B(7): 1047–1055.
53. Kishi T, Kitajima T, Ikeda M, Yamanouchi Y, Kinoshita Y, et al. (2009) CLOCK may predict the response to fluvoxamine treatment in Japanese major depressive disorder patients. *Neuromolecular Med* 11(2): 53–57.
54. Desan PH, Oren DA, Malison R, Price LH, Rosenbaum J, et al. (2000) Genetic polymorphism at the CLOCK gene locus and major depression. *Am J Med Genet* 96(3): 418–421.
55. Kishi T, Kitajima T, Ikeda M, Yamanouchi Y, Kinoshita Y, et al. (2009) Association study of clock gene (CLOCK) and schizophrenia and mood disorders in the Japanese population. *Eur Arch Psychiatry Clin Neurosci* 259(5): 293–297.
56. Bailer U, Wiesegger G, Leisch F, Fuchs K, Leitner I, et al. (2005) No association of clock gene T3111C polymorphism and affective disorders. *Eur Neuropsychopharmacol* 15(1): 51–55.
57. Nicholas B, Rudrasingham V, Nash S, Kirov G, Owen MJ, et al. (2007) Association of Per1 and Npas2 with autistic disorder: Support for the clock genes/social timing hypothesis. *Mol Psychiatry* 12(6): 581–592.
58. Varilo T, Peltonen L (2004) Isolates and their potential use in complex gene mapping efforts. *Curr Opin Genet Dev* 14(3): 316–323.
