# Supplementary material for: ARNTL (BMAL1) and NPAS2 Gene Variants Contribute to Fertility and Seasonality
Source: PubMed Central journal article supplement (PMC2848852; doi:10.1371/journal.pone.0010007), 2010-04-02
Supplement: pone.0010007.s002.pdf [file pone.0010007.s002.pdf]

**Table S1. SNPs with p-value≤0.01.**

| Reproduction variables         | Gene  | SNP        | Test | Re        | Beta    | S.E. | L95% CI | U95% CI | P-value  |
|--------------------------------|-------|------------|------|-----------|---------|------|---------|---------|----------|
| Number of pregnancies          | ARNTL | rs2278749  | REC  | <i>TT</i> | 7.2     | 2.12 | 3.04    | 11.35   | 0.001    |
| Number of miscarriages         | ARNTL | rs2278749  | REC  | <i>TT</i> | 4.65    | 0.83 | 3.03    | 6.27    | 2.50E-07 |
| Number of miscarriages         | NPAS2 | rs11673746 | DOM  | <i>T+</i> | -0.64   | 0.2  | -1.03   | -0.25   | 0.002    |
| Number of miscarriages         | NPAS2 | rs11673746 | ADD  | <i>T</i>  | -0.47   | 0.15 | -0.77   | -0.16   | 0.003    |
| Seasonal variation variables   | Gene  | SNP        | Test | Re        | OR/Beta | S.E. | L95% CI | U95% CI | P-value  |
| GSS                            | NPAS2 | rs2305160  | DOM  | <i>A+</i> | -0.81   | 0.24 | -1.29   | -0.33   | 0.001    |
| GSS                            | NPAS2 | rs2305160  | ADD  | <i>A</i>  | -0.57   | 0.19 | -0.94   | -0.2    | 0.003    |
| GSS                            | ARNTL | rs2290035  | REC  | <i>TT</i> | -0.92   | 0.31 | -1.53   | -0.3    | 0.004    |
| GSS1                           | NPAS2 | rs6725296  | ADD  | <i>A</i>  | 0.27    | 0.08 | 0.11    | 0.42    | 0.001    |
| GSS1                           | NPAS2 | rs6725296  | DOM  | <i>A+</i> | 0.27    | 0.08 | 0.1     | 0.43    | 0.001    |
| GSS2                           | NPAS2 | rs2305160  | DOM  | <i>A+</i> | -0.19   | 0.07 | -0.34   | -0.05   | 0.008    |
| Seasonal variation in weight   | NPAS2 | rs6725296  | ADD  | <i>A</i>  | 1.95    | 0.2  | 1.32    | 2.89    | 0.001    |
| Seasonal variation in weight   | NPAS2 | rs6725296  | DOM  | <i>A+</i> | 1.95    | 0.21 | 1.29    | 2.96    | 0.002    |
| Seasonal variation in weight   | NPAS2 | rs2305160  | DOM  | <i>A+</i> | 0.63    | 0.18 | 0.44    | 0.89    | 0.01     |
| Seasonal variation in appetite | ARNTL | rs2290035  | REC  | <i>TT</i> | 0.47    | 0.26 | 0.28    | 0.78    | 0.004    |
| Seasonal variation in appetite | ARNTL | rs2290035  | ADD  | <i>T</i>  | 0.7     | 0.13 | 0.54    | 0.91    | 0.007    |
| Seasonal variation in energy   | ARNTL | rs2290035  | REC  | <i>TT</i> | 0.45    | 0.24 | 0.28    | 0.72    | 0.001    |
| Vitamin D                      | NPAS2 | rs6725296  | DOM  | <i>A+</i> | 4.38    | 1.68 | 1.09    | 7.67    | 0.009    |
| Well-being variables           | Gene  | SNP        | Test | Re        | OR/Beta | S.E. | L95% CI | U95% CI | P        |
| ESS2                           | NPAS2 | rs2305160  | REC  | <i>AA</i> | 0.44    | 0.15 | 0.14    | 0.74    | 0.004    |
| ESS2                           | CLOCK | rs2412646  | REC  | <i>TT</i> | 0.42    | 0.16 | 0.11    | 0.73    | 0.009    |
| Social activity                | CLOCK | rs2412646  | REC  | <i>TT</i> | 0.2     | 0.53 | 0.07    | 0.56    | 0.002    |

Results presented for the rare allele/genotype.

Abbreviations: ADD, additive model; DOM, dominant model; REC, recessive model; Re, reference allele / genotype(s); OR/Beta, odds ratio/regression coefficient; S.E., standard error; L/U95% CI, lower/upper bound on confidence interval; GSS, Global seasonality score; GSS1, Global seasonality score factor 1; GSS2, Global seasonality score factor 2; ESS2, Epworth Sleepiness Scale factor 2.
