# Supplementary material for: ARNTL (BMAL1) and NPAS2 Gene Variants Contribute to Fertility and Seasonality
Source: PubMed Central journal article supplement (PMC2848852; doi:10.1371/journal.pone.0010007), 2010-04-02
Supplement: pone.0010007.s003.pdf [file pone.0010007.s003.pdf]

**Table S2. Haplotype associations, p<0.05.**

| Variable  | Gene          | SNP1      | SNP2      | Haplotype   | F    | Beta   | P-value |
|-----------|---------------|-----------|-----------|-------------|------|--------|---------|
| 15-D1     | <i>ARNTL2</i> | RS1037921 | RS2306074 | <i>CG</i>   | 0.08 | -0.107 | 0.041   |
| 15-D2     | <i>CLOCK</i>  | RS2412646 | RS11240   | <i>TC</i>   | 0.28 | -0.086 | 0.046   |
| 15-D2     | <i>CLOCK</i>  | RS2412646 | RS2412648 | <i>TCT</i>  | 0.28 | -0.086 | 0.046   |
| 15-D2     | <i>CLOCK</i>  | RS11240   | RS3805151 | <i>CTT</i>  | 0.28 | -0.086 | 0.046   |
| 15-D2     | <i>CLOCK</i>  | RS2412646 | RS3805151 | <i>TCTT</i> | 0.28 | -0.086 | 0.046   |
| 15-D3     | <i>CLOCK</i>  | RS2412646 | RS11240   | <i>CC</i>   | 0.39 | -0.061 | 0.019   |
| 15-D3     | <i>CLOCK</i>  | RS2412648 | RS3805151 | <i>TT</i>   | 0.61 | 0.061  | 0.019   |
| 15-D3     | <i>CLOCK</i>  | RS2412648 | RS3805151 | <i>GC</i>   | 0.34 | -0.058 | 0.028   |
| 15-D3     | <i>CLOCK</i>  | RS11240   | RS3805151 | <i>CGC</i>  | 0.34 | -0.058 | 0.028   |
| 15-D3     | <i>CLOCK</i>  | RS2412646 | RS3805151 | <i>CCGC</i> | 0.34 | -0.058 | 0.028   |
| 15-D3     | <i>CLOCK</i>  | RS11240   | RS2412648 | <i>CG</i>   | 0.34 | -0.056 | 0.034   |
| 15-D3     | <i>CLOCK</i>  | RS2412646 | RS2412648 | <i>CCG</i>  | 0.34 | -0.056 | 0.034   |
| Vitamin D | <i>CLOCK</i>  | RS2412646 | RS11240   | <i>CG</i>   | 0.34 | -2.65  | 0.017   |
| Vitamin D | <i>CLOCK</i>  | RS11240   | RS2412648 | <i>GT</i>   | 0.34 | -2.65  | 0.017   |
| Vitamin D | <i>CLOCK</i>  | RS2412646 | RS2412648 | <i>CGT</i>  | 0.34 | -2.65  | 0.017   |
| Vitamin D | <i>CLOCK</i>  | RS11240   | RS3805151 | <i>GTT</i>  | 0.34 | -2.65  | 0.017   |
| Vitamin D | <i>CLOCK</i>  | RS2412646 | RS3805151 | <i>CGTT</i> | 0.34 | -2.65  | 0.017   |

Abbreviations: SNP1, SNP ID of left-most (5') SNP; SNP2, SNP ID of left-most (3') SNP; F, Frequency in sample; Beta, regression coefficient.
