# Supplementary material for: ARNTL (BMAL1) and NPAS2 Gene Variants Contribute to Fertility and Seasonality
Source: PubMed Central journal article supplement (PMC2848852; doi:10.1371/journal.pone.0010007), 2010-04-02
Supplement: pone.0010007.s004.pdf [file pone.0010007.s004.pdf]

**Figure S1. LD plots for *NPAS2*, *ARNTL*, *ARNTL2* and *CLOCK*.**

*NPAS2*

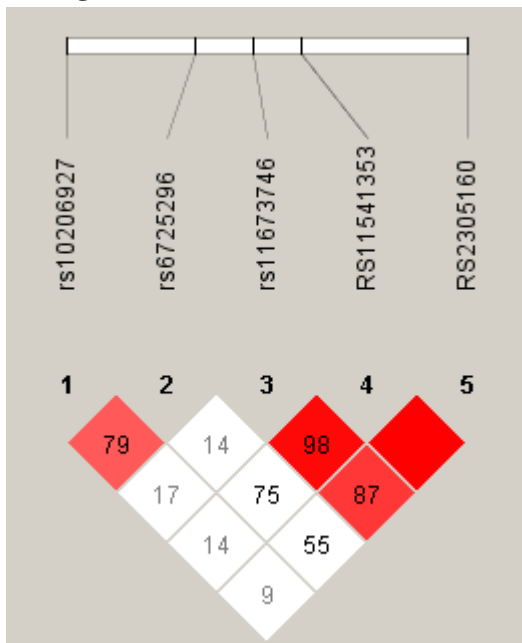

*ARNTL2*

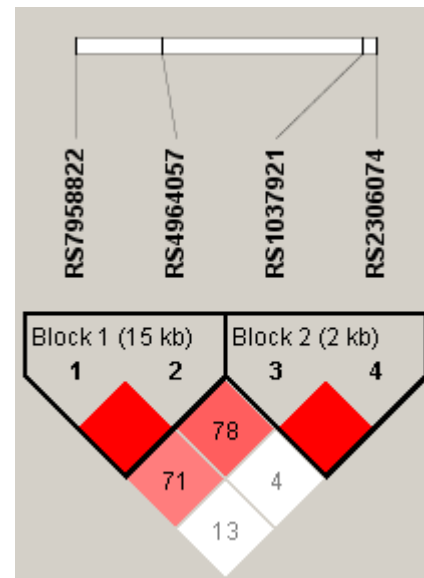

*ARNTL*

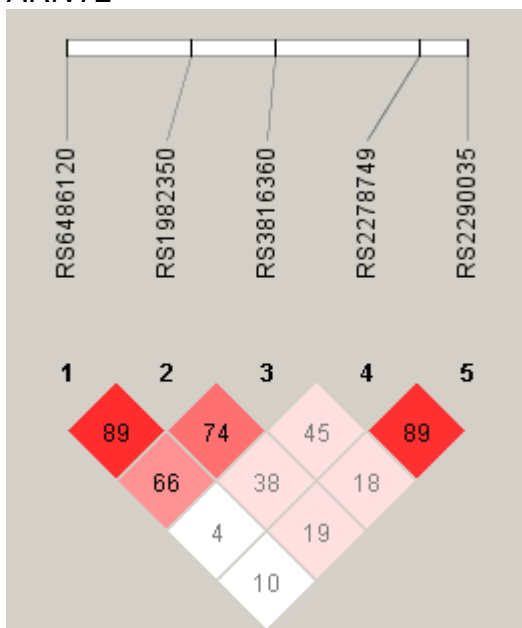

*CLOCK*

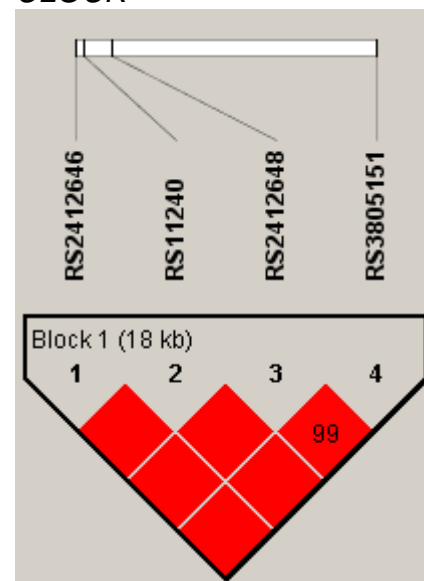

D prime values shown, except if 1.0.
